# Supplementary material for: Arsenic and Heavy Metals in Vietnamese Rice: Assessment of Human Exposure to These Elements through Rice Consumption
Source: Hindawi journal article supplement (doi:10.1155/2021/6661955), 2021-01-22
Supplement: f1 [file 6661955.f1.pdf]

*Supplementary Information*

**Arsenic and heavy metals in Vietnamese rice: Assessment of human exposure to these elements through rice consumption**

Dinh Binh Chu<sup>1,\*</sup>, Hung Tuan Duong<sup>2</sup>, Minh Thi Nguyet Luu<sup>2</sup>, Hong-An Vu-Thi<sup>1</sup>, Bich-Thuy Ly<sup>3</sup>, Vu Duc Loi<sup>2</sup>

1. Department of Analytical Chemistry, School of Chemical Engineering, Hanoi University of Science and Technology, 1 Dai Co Viet, Hai Ba Trung, Hanoi 100000, Vietnam
2. Institute of Chemistry, Vietnam Academy of Science and Technology (VAST), 18 Hoang Quoc Viet, Cau Giay, Hanoi 100000, Vietnam
3. School of Environmental Science and Technology, Hanoi University of Science and Technology, 1 Dai Co Viet, Hai Ba Trung, Hanoi 100000, Vietnam

Table S1. Operating condition of ICP-DRC-QMS for multielement analysis

| Parameters                         | Value                                                                                                                                                                                                                                                                                                                                                                                |
|------------------------------------|--------------------------------------------------------------------------------------------------------------------------------------------------------------------------------------------------------------------------------------------------------------------------------------------------------------------------------------------------------------------------------------|
| ICP-MS                             | Nexion 2000 ICP-DRC-QMS (Perkin Elmer, Ottawa, Canada)                                                                                                                                                                                                                                                                                                                               |
| RF power                           | 1600W                                                                                                                                                                                                                                                                                                                                                                                |
| Plasma gas flow                    | 15 L min <sup>-1</sup>                                                                                                                                                                                                                                                                                                                                                               |
| Auxiliary gas flow                 | 1.2 L min <sup>-1</sup>                                                                                                                                                                                                                                                                                                                                                              |
| Nebulizer gas                      | 1 L min <sup>-1</sup>                                                                                                                                                                                                                                                                                                                                                                |
| Nebulizer                          | PFA                                                                                                                                                                                                                                                                                                                                                                                  |
| Spray chamber                      | Quartz cyclonic                                                                                                                                                                                                                                                                                                                                                                      |
| Sample cone                        | Platinum sample cone                                                                                                                                                                                                                                                                                                                                                                 |
| Skimmer cone                       | Platinum hyper skimmer cone                                                                                                                                                                                                                                                                                                                                                          |
| Cell entrance voltage              | -7 V                                                                                                                                                                                                                                                                                                                                                                                 |
| Cell exit voltage                  | -7 V                                                                                                                                                                                                                                                                                                                                                                                 |
| DRC mode                           | Dynamic reaction cell with oxygen gas, 0.7 mL min <sup>-1</sup>                                                                                                                                                                                                                                                                                                                      |
| Monitored ions                     | <sup>75</sup> As <sup>16</sup> O <sup>+</sup> (m/z 91); <sup>111</sup> Cd <sup>+</sup> ; <sup>59</sup> Co <sup>+</sup> ; <sup>52</sup> Cr <sup>+</sup> ; <sup>65</sup> Cu <sup>+</sup> ; <sup>60</sup> Ni <sup>+</sup> ; <sup>208</sup> Pb <sup>+</sup> ; <sup>78</sup> Se <sup>16</sup> O <sup>+</sup> (m/z 94); <sup>66</sup> Zn <sup>+</sup> and <sup>115</sup> In <sup>+</sup> . |
| Measurement repeatability          | 3 times                                                                                                                                                                                                                                                                                                                                                                              |
| Reading                            | 5 times                                                                                                                                                                                                                                                                                                                                                                              |
| Polyatomic interference correction | on                                                                                                                                                                                                                                                                                                                                                                                   |
| Measurement mode                   | Peak hopping                                                                                                                                                                                                                                                                                                                                                                         |
| Dwell time                         | 200 ms                                                                                                                                                                                                                                                                                                                                                                               |
| RPq                                | 0.6                                                                                                                                                                                                                                                                                                                                                                                  |
| Quantification mode                | Internal calibration curve, <sup>115</sup> In <sup>+</sup> as an internal standard                                                                                                                                                                                                                                                                                                   |

Table S2. Operating conditions of F-AAS for measurement of Fe and Mn

| <b>Parameters</b>      | <b>Value</b>                                                      |
|------------------------|-------------------------------------------------------------------|
| AAS                    | AA900 (Perkin Elmer, Ottawa, Canada)                              |
| C2H2 flow rate         | 2.2 L min <sup>-1</sup> for Fe and 2.0 L min <sup>-1</sup> for Mn |
| Compress air flow rate | 10 L min <sup>-1</sup>                                            |
| HCL current for Fe     | 25 mA                                                             |
| HCL current for Mn     | 15 mA                                                             |
| Slit width             | 0.2 nm                                                            |
| Wave length for Fe     | 248.3 nm                                                          |
| Wave length for Mn     | 279.5 nm                                                          |
| Quantification mode    | Peak height                                                       |
| Quantification         | External calibration                                              |

Table S3 Concentration of analysed elements (mg kg<sup>-1</sup> dry weight) in rice samples

| No | Sample code | As    | Cd    | Co    | Cr      | Cu    | Fe   | Hg   | Mn     | Ni      | Pb      | Se   | Zn     |
|----|-------------|-------|-------|-------|---------|-------|------|------|--------|---------|---------|------|--------|
| 1  | R1          | 0.081 | 0.096 | 0.001 | 0.067   | 2.312 | 6.3  | < DL | 10.975 | 0.164   | 0.144   | < DL | 6.641  |
| 2  | R2          | 0.087 | 0.021 | 0.001 | 0.063   | 0.683 | 7.8  | < DL | 7.444  | 0.047   | < DL    | < DL | 6.011  |
| 3  | R3          | 0.073 | 0.013 | < DL  | < DL    | 1.013 | 3.6  | < DL | 8.699  | 0.067   | < DL    | < DL | 7.076  |
| 4  | R4          | 0.081 | 0.092 | 0.001 | 0.178   | 2.673 | 15.6 | < DL | 11.566 | 0.147   | < DL    | < DL | 6.667  |
| 5  | R5          | 0.055 | 0.201 | < DL  | < 0.001 | 3.385 | 6.4  | < DL | 12.332 | 0.510   | < DL    | < DL | 7.913  |
| 6  | R6          | 0.083 | 0.067 | 0.004 | 0.141   | 2.239 | 14.6 | < DL | 10.586 | 0.103   | < DL    | < DL | 6.846  |
| 7  | R7          | 0.061 | 0.035 | 0.001 | < 0.001 | 1.712 | 8.2  | < DL | 8.762  | 0.153   | < DL    | < DL | 6.938  |
| 8  | R8          | 0.063 | 0.088 | < DL  | 0.004   | 2.637 | 16.2 | < DL | 10.941 | 0.119   | < DL    | < DL | 7.446  |
| 9  | R9          | 0.052 | 0.222 | 0.001 | 0.004   | 3.038 | 35.7 | < DL | 11.590 | 0.277   | < DL    | < DL | 11.004 |
| 10 | R10         | 0.080 | 0.009 | < DL  | 0.011   | 1.102 | 16.6 | < DL | 8.852  | 0.095   | < DL    | < DL | 6.486  |
| 11 | R11         | 0.328 | 0.114 | 0.017 | 0.999   | 3.801 | 14.6 | < DL | 12.846 | 0.420   | < DL    | < DL | 10.217 |
| 12 | R12         | 0.089 | 0.013 | 0.001 | < 0.001 | 0.982 | 13.5 | < DL | 7.480  | 0.069   | < DL    | < DL | 7.108  |
| 13 | R13         | 0.063 | 0.055 | 0.003 | 0.293   | 2.107 | 18.1 | < DL | 11.735 | 0.192   | 0.010   | < DL | 9.458  |
| 14 | R14         | 0.064 | 0.158 | 0.005 | < 0.001 | 3.453 | 7.1  | < DL | 12.718 | 0.269   | 0.013   | < DL | 8.778  |
| 15 | R15         | 0.069 | 0.153 | 0.003 | 0.013   | 2.315 | 22.7 | < DL | 10.585 | 0.326   | 0.008   | < DL | 9.443  |
| 16 | R16         | 0.109 | 0.009 | < DL  | < 0.001 | 1.437 | 12.2 | < DL | 8.617  | 0.084   | < DL    | < DL | 8.218  |
| 17 | R17         | 0.087 | 0.055 | 0.009 | 0.598   | 1.463 | 5.5  | < DL | 9.934  | 0.364   | < DL    | < DL | 8.568  |
| 18 | R18         | 0.096 | 0.018 | 0.005 | < 0.001 | 0.950 | 13.0 | < DL | 8.566  | 0.247   | 0.027   | < DL | 7.448  |
| 19 | R19         | 0.122 | 0.008 | 0.011 | < 0.001 | 2.098 | 8.7  | < DL | 9.151  | < 0.001 | < DL    | < DL | 9.536  |
| 20 | R20         | 0.122 | 0.018 | 0.011 | 0.135   | 2.629 | 34.7 | < DL | 9.882  | 0.075   | < DL    | < DL | 8.086  |
| 21 | R21         | 0.095 | 0.021 | 0.008 | < DL    | 2.867 | 11.9 | < DL | 11.128 | 0.093   | < DL    | < DL | 9.318  |
| 22 | R22         | 0.090 | 0.018 | 0.014 | 0.160   | 3.859 | 1.3  | < DL | 9.282  | 0.095   | 0.054   | < DL | 6.999  |
| 23 | R23         | 0.132 | 0.047 | 0.002 | 0.059   | 5.405 | 5.3  | < DL | 11.682 | < 0.001 | < DL    | < DL | 8.895  |
| 24 | R24         | 0.098 | 0.068 | 0.017 | 0.040   | 3.719 | 0.2  | < DL | 14.012 | 0.153   | < 0.001 | < DL | 9.098  |
| 25 | R25         | 0.151 | 0.027 | 0.006 | 0.043   | 3.310 | 22.8 | < DL | 9.301  | 0.144   | 0.032   | < DL | 8.758  |
| 26 | R26         | 0.113 | 0.037 | 0.013 | 0.376   | 3.121 | 3.6  | < DL | 10.144 | 0.300   | < DL    | < DL | 9.258  |
| 27 | R27         | 0.105 | 0.111 | 0.017 | 0.079   | 4.607 | 4.1  | < DL | 12.311 | 0.221   | 0.009   | < DL | 9.252  |
| 28 | R28         | 0.175 | 0.059 | 0.015 | 0.135   | 3.547 | 2.5  | < DL | 10.944 | 0.210   | 0.019   | < DL | 7.565  |
| 29 | R29         | 0.122 | 0.086 | 0.009 | 0.551   | 2.341 | 6.9  | < DL | 13.702 | 0.000   | 0.003   | < DL | 9.481  |
| 30 | R30         | 0.103 | 0.185 | 0.018 | 0.609   | 3.574 | 28.8 | < DL | 12.429 | 0.391   | 0.034   | < DL | 11.299 |
| 31 | R31         | 0.131 | 0.049 | 0.013 | 1.223   | 2.898 | 16.9 | < DL | 13.527 | 0.100   | < DL    | < DL | 7.461  |

| No | Sample code | As           | Cd           | Co             | Cr           | Cu           | Fe            | Hg             | Mn            | Ni           | Pb             | Se             | Zn            |
|----|-------------|--------------|--------------|----------------|--------------|--------------|---------------|----------------|---------------|--------------|----------------|----------------|---------------|
| 32 | R32         | 0.158        | 0.027        | 0.009          | 0.915        | 1.319        | 18.1          | < DL           | 8.256         | < 0.001      | < DL           | < DL           | 6.464         |
| 33 | R33         | 0.111        | 0.005        | 0.008          | 0.963        | 0.118        | 8.1           | < DL           | 10.843        | < 0.001      | < DL           | < DL           | 6.791         |
| 34 | R34         | 0.114        | 0.019        | 0.015          | 0.903        | 1.317        | 2.8           | < DL           | 11.362        | 0.103        | 0.104          | < DL           | 7.355         |
| 35 | R35         | 0.131        | 0.007        | 0.007          | 0.799        | 0.192        | 2.6           | < DL           | 9.456         | 0.010        | < DL           | < DL           | 7.822         |
|    | <b>Mean</b> | <b>0.106</b> | <b>0.063</b> | <b>0.008</b>   | <b>0.360</b> | <b>2.406</b> | <b>11.914</b> | <b>&lt; DL</b> | <b>10.618</b> | <b>0.179</b> | <b>0.038</b>   | <b>&lt; DL</b> | <b>8.163</b>  |
|    | <b>Max</b>  | <b>0.328</b> | <b>0.222</b> | <b>0.018</b>   | <b>1.223</b> | <b>5.405</b> | <b>35.7</b>   | <b>&lt; DL</b> | <b>14.012</b> | <b>0.51</b>  | <b>0.144</b>   | <b>&lt; DL</b> | <b>11.299</b> |
|    | <b>Min</b>  | <b>0.052</b> | <b>0.005</b> | <b>&lt; DL</b> | <b>0.004</b> | <b>0.118</b> | <b>0.2</b>    | <b>&lt; DL</b> | <b>7.444</b>  | <b>0.00</b>  | <b>&lt; DL</b> | <b>&lt; DL</b> | <b>6.011</b>  |
|    | <b>SD</b>   | <b>0.049</b> | <b>0.060</b> | <b>0.006</b>   | <b>0.368</b> | <b>1.243</b> | <b>8.972</b>  | <b>&lt; DL</b> | <b>1.762</b>  | <b>0.132</b> | <b>0.031</b>   | <b>&lt; DL</b> | <b>1.344</b>  |
| 36 | TN1         | 0.185        | 0.099        | 0.621          | 0.364        | 6.074        | 28.303        | < DL           | 36.339        | 0.730        | 0.114          | < DL           | 11.402        |
| 37 | TN2         | 0.214        | 0.107        | 0.568          | < DL         | 7.754        | 39.812        | < DL           | 29.406        | 0.918        | 0.146          | < DL           | 8.470         |
| 38 | TN3         | 0.149        | 0.181        | 0.791          | 0.242        | 3.007        | 14.345        | < DL           | 42.650        | 0.370        | 0.076          | < DL           | 11.653        |
| 39 | TN4         | 0.087        | 0.192        | 0.496          | < DL         | 2.971        | 10.146        | < DL           | 20.940        | 0.376        | 0.052          | < DL           | 7.178         |
| 40 | TN5         | 0.135        | 0.090        | 0.797          | < DL         | 3.615        | 10.737        | < DL           | 25.505        | 0.647        | 0.114          | < DL           | 7.882         |
| 41 | TN6         | 0.094        | 0.117        | 0.634          | < DL         | 4.754        | 9.268         | < DL           | 22.303        | 0.737        | 0.128          | < DL           | 9.740         |
| 42 | TN7         | 0.084        | 0.258        | 0.760          | 0.099        | 4.397        | 9.066         | < DL           | 23.500        | 0.948        | 0.108          | < DL           | 9.196         |
| 43 | TN8         | 0.149        | 0.455        | 0.379          | < DL         | 3.969        | 14.103        | < DL           | 19.281        | 0.654        | 0.135          | < DL           | 7.744         |
| 44 | TN9         | 0.110        | 0.115        | 0.495          | < DL         | 7.559        | 47.314        | < DL           | 21.398        | 1.243        | 0.088          | < DL           | 9.051         |
| 45 | TN10        | 0.102        | 0.320        | 0.483          | 0.177        | 5.644        | 10.696        | < DL           | 35.672        | 1.237        | 0.177          | < DL           | 11.487        |
| 46 | TN11        | 0.107        | 0.480        | 0.491          | 0.071        | 3.750        | 14.579        | < DL           | 34.008        | 0.651        | 0.058          | < DL           | 7.265         |
| 47 | TN12        | 0.065        | 0.429        | 0.566          | 0.114        | 5.689        | 9.206         | < DL           | 25.563        | 1.094        | 0.106          | < DL           | 9.941         |
| 48 | TN13        | 0.207        | 0.168        | 0.369          | 0.029        | 3.681        | 7.195         | < DL           | 25.593        | 0.852        | 0.073          | < DL           | 8.154         |
| 49 | TN14        | 0.269        | 0.035        | 0.137          | 0.165        | 2.152        | 15.813        | < DL           | 21.943        | 0.470        | 0.084          | < DL           | 6.571         |
| 50 | TN15        | 0.137        | 0.143        | 0.040          | 0.111        | 4.932        | 17.350        | < DL           | 35.278        | 0.607        | 0.078          | < DL           | 9.928         |
| 51 | TN16        | 0.081        | 0.181        | 0.495          | 0.035        | 3.631        | 10.980        | < DL           | 28.121        | 0.364        | 0.075          | < DL           | 8.446         |
| 52 | TN17        | 0.080        | 0.017        | 0.021          | 0.038        | 2.337        | 11.232        | 0.004          | 23.287        | 0.289        | 0.104          | < DL           | 5.341         |
| 53 | TN18        | 0.053        | 0.339        | 0.691          | 0.265        | 3.753        | 7.052         | < DL           | 31.346        | 0.861        | 0.056          | < DL           | 7.302         |
| 54 | TN19        | 0.145        | 0.017        | 0.087          | 0.191        | 1.491        | 17.378        | < DL           | 32.532        | 0.211        | 0.078          | < DL           | 7.358         |
| 55 | TN20        | 0.088        | 0.145        | 0.208          | < DL         | 3.245        | 8.998         | < DL           | 30.746        | 0.557        | 0.089          | < DL           | 7.560         |
| 56 | TN21        | 0.112        | 0.214        | 1.369          | < DL         | 3.302        | 16.116        | < DL           | 38.138        | 0.435        | 0.070          | < DL           | 8.116         |
| 57 | TN22        | 0.103        | 0.088        | 0.143          | 0.060        | 1.717        | 9.397         | 0.009          | 20.986        | 0.194        | 0.048          | < DL           | 6.511         |
| 58 | TN23        | 0.087        | 0.117        | 0.125          | 0.030        | 2.493        | 10.326        | < DL           | 24.973        | 0.295        | 0.059          | < DL           | 7.759         |
| 59 | TN24        | 0.085        | 0.067        | 0.565          | < DL         | 3.452        | 13.518        | < DL           | 27.121        | 0.312        | 0.051          | < DL           | 8.436         |
| 60 | TN25        | 0.187        | 0.025        | 0.490          | < DL         | 2.599        | 14.575        | < DL           | 25.771        | 0.251        | 0.054          | < DL           | 6.635         |

| No | Sample code | As           | Cd           | Co            | Cr            | Cu           | Fe            | Hg            | Mn            | Ni            | Pb           | Se             | Zn            |
|----|-------------|--------------|--------------|---------------|---------------|--------------|---------------|---------------|---------------|---------------|--------------|----------------|---------------|
| 61 | TN26        | 0.094        | 0.207        | 0.534         | 0.439         | 6.908        | 14.534        | < DL          | 38.654        | 0.716         | 0.066        | < DL           | 6.476         |
| 62 | TN27        | 0.169        | 0.073        | 0.562         | < DL          | 2.553        | 18.618        | < DL          | 29.492        | 0.208         | 0.078        | < DL           | 7.336         |
| 63 | TN28        | 0.094        | 0.097        | 0.470         | 0.119         | 2.487        | 13.607        | < DL          | 29.916        | 0.387         | 0.111        | < DL           | 6.966         |
| 64 | TN29        | 0.178        | 0.078        | 0.731         | 0.650         | 4.078        | 13.405        | < DL          | 27.637        | 0.506         | 0.059        | < DL           | 7.518         |
| 65 | TN30        | 0.165        | 0.122        | 0.987         | 0.466         | 3.791        | 16.037        | 0.011         | 28.046        | 0.405         | 0.157        | < DL           | 7.324         |
| 66 | TN31        | 0.099        | 0.095        | 0.615         | 0.038         | 3.604        | 13.287        | 0.004         | 21.708        | 0.361         | 0.051        | < DL           | 8.273         |
| 67 | TN32        | 0.111        | 0.144        | 0.575         | 0.412         | 3.262        | 10.467        | 0.005         | 28.465        | 0.442         | 0.082        | < DL           | 7.984         |
| 68 | TN33        | 0.119        | 0.158        | 0.577         | 0.397         | 3.756        | 10.544        | < DL          | 25.333        | 0.557         | 0.139        | < DL           | 7.692         |
| 69 | TN34        | 0.097        | 0.069        | 0.456         | 0.349         | 3.756        | 9.881         | < DL          | 25.105        | 0.415         | 0.055        | < DL           | 8.456         |
| 70 | TN35        | 0.080        | 0.083        | 0.585         | 0.576         | 3.263        | 13.626        | < DL          | 20.377        | 0.474         | 0.065        | < DL           | 8.523         |
|    | <b>Mean</b> | <b>0.123</b> | <b>0.158</b> | <b>0.512</b>  | <b>0.227</b>  | <b>3.869</b> | <b>14.615</b> | <b>0.007</b>  | <b>27.918</b> | <b>0.565</b>  | <b>0.088</b> | <b>&lt; DL</b> | <b>8.162</b>  |
|    | <b>Max</b>  | <b>0.269</b> | <b>0.48</b>  | <b>1.369</b>  | <b>0.65</b>   | <b>7.754</b> | <b>47.314</b> | <b>0.011</b>  | <b>42.65</b>  | <b>1.243</b>  | <b>0.177</b> | <b>&lt; DL</b> | <b>11.653</b> |
|    | <b>Min</b>  | <b>0.053</b> | <b>0.017</b> | <b>0.021</b>  | <b>0.029</b>  | <b>1.491</b> | <b>7.052</b>  | <b>&lt;DL</b> | <b>19.281</b> | <b>0.194</b>  | <b>0.048</b> | <b>&lt; DL</b> | <b>5.341</b>  |
|    | <b>SD</b>   | <b>0.048</b> | <b>0.119</b> | <b>0.273</b>  | <b>0.187</b>  | <b>1.512</b> | <b>8.304</b>  | <b>0.003</b>  | <b>5.871</b>  | <b>0.283</b>  | <b>0.034</b> | <b>&lt; DL</b> | <b>1.442</b>  |
|    | <b>Mean</b> | <b>0.115</b> | <b>0.111</b> | <b>0.279</b>  | <b>0.296</b>  | <b>3.138</b> | <b>13.264</b> | <b>0.007</b>  | <b>19.268</b> | <b>0.384</b>  | <b>0.075</b> | <b>&lt; DL</b> | <b>8.163</b>  |
|    | <b>Max</b>  | <b>0.328</b> | <b>0.480</b> | <b>1.369</b>  | <b>1.223</b>  | <b>7.754</b> | <b>47.314</b> | <b>0.011</b>  | <b>42.650</b> | <b>1.243</b>  | <b>0.177</b> | <b>&lt; DL</b> | <b>11.653</b> |
|    | <b>Min</b>  | <b>0.052</b> | <b>0.005</b> | <b>&lt;DL</b> | <b>&lt;DL</b> | <b>0.118</b> | <b>0.200</b>  | <b>&lt;DL</b> | <b>7.444</b>  | <b>&lt;DL</b> | <b>0.003</b> | <b>&lt; DL</b> | <b>5.341</b>  |
|    | <b>SD</b>   | <b>0.049</b> | <b>0.105</b> | <b>0.318</b>  | <b>0.295</b>  | <b>1.559</b> | <b>8.688</b>  | <b>0.003</b>  | <b>9.717</b>  | <b>0.300</b>  | <b>0.050</b> | <b>&lt; DL</b> | <b>1.384</b>  |

< DL: below detection limit
